# Supplementary material for: Preparation and performance of DOPO-nano-SiO2 modified polyacrylic acid-based flame retardant dust suppressant for coal
Source: Royal Society of Chemistry journal article supplement (doi:10.1039/d1nj02983e), 2021-01-01
Supplement: d1nj02983e1.pdf [file d1nj02983e1.pdf]

## *Supplementary Information for*

### **Preparation and performance of DOPO-nano-SiO<sub>2</sub> modified polyacrylic acid-based flame retardant dust suppressant for coal**

Shuili Lai,<sup>\*abc</sup> Gong Chen,<sup>abc</sup> and Wen Hu,<sup>abc</sup> Baojian Liu,<sup>abc</sup> Xin Yang,<sup>abc</sup> Kai Gao<sup>abc</sup>

<sup>a</sup> *College of Chemistry and Chemical Engineering, Shaanxi University of Science and Technology, Xi'an 710021, People's Republic of China*

<sup>b</sup> *Shaanxi Key Laboratory of Chemical Additives for Industry, Shaanxi University of Science and Technology, Xi'an 710021, People's Republic of China*

<sup>c</sup> *Key Laboratory of Chemical Additives for China National Light Industry, Shaanxi University of Science and Technology, Xi'an, 710021, People's Republic of China*

**\*Corresponding Author:**

Name: Shuili Lai

Address: College of Chemistry and Chemical Engineering, Shaanxi University of Science and Technology, Xi'an, Shaanxi Province, People's Republic of China

E-mail: [1808102@sust.edu.cn](mailto:1808102@sust.edu.cn)

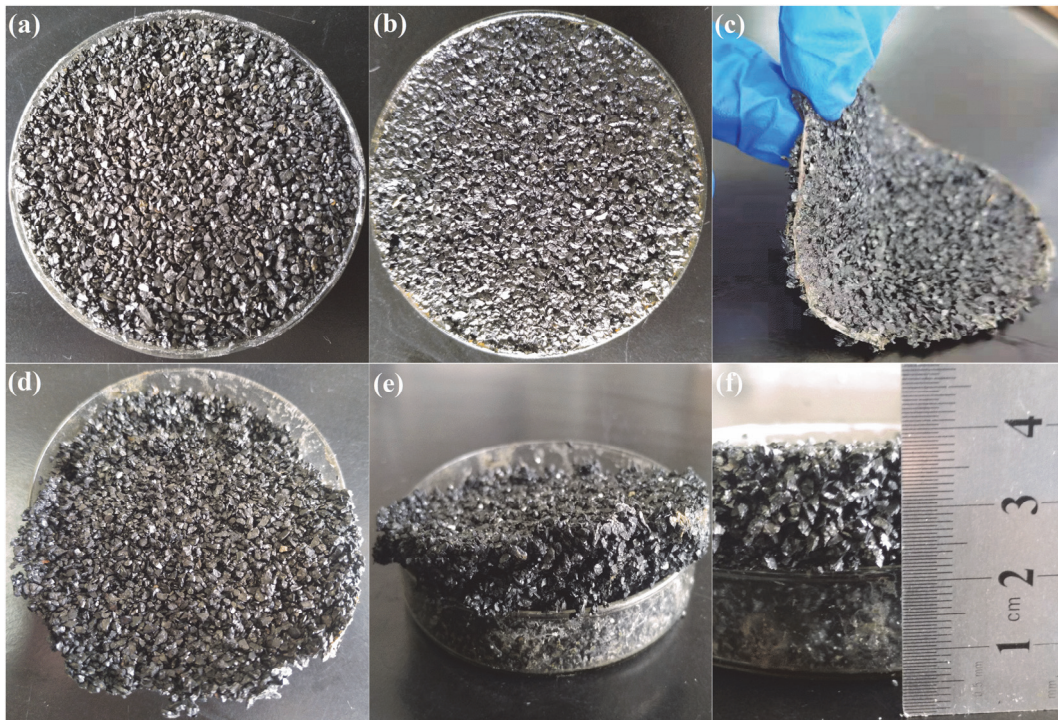

Figure S1. Surface morphology of pulverized coal sprayed with water (a) and flame retardant dust suppressant (b); (c) flame retardant dust suppressant soft film formed on the surface of pulverized coal; (d~f) consolidation layer formed on the surface of pulverized coal.
